# Supplementary material for: CHO cell engineering via targeted integration of circular miR-21 decoy using CRISPR/RMCE hybrid system
Source: Springer Nature journal article supplement (doi:10.1007/s00253-024-13266-4), 2024-08-09
Supplement: MOESM1 [file 253_2024_13266_MOESM1_ESM.pdf]

## **Supplemental Material**

### **Applied Microbiology and Biotechnology**

#### **CHO Cell Engineering via Targeted Integration of Circular miR-21 Decoy Using CRIS-PITCh/Bxb1 Hybrid System**

**Setare Adibzadeh<sup>1,2</sup>, Shahin Amiri<sup>1,2</sup>, Farzaneh Barkhordari<sup>1</sup>, Seyed Javad Mowla<sup>3</sup>, Hadi Bayat<sup>4</sup>, Samaneh Ghanbari<sup>1</sup>, Faezeh Faghihi<sup>\*5</sup>, Fatemeh Davami<sup>1\*</sup>**

<sup>1</sup>Department of Medical Biotechnology, Biotechnology Research Center, Pasteur Institute of Iran, Tehran, Iran

<sup>2</sup>Student Research Committee, Pasteur Institute of Iran, Tehran, Iran

<sup>3</sup>Department of Molecular Genetics, Faculty of Biological Sciences, Tarbiat Modares University, Tehran, Iran

<sup>4</sup> Biochemical Neuroendocrinology, Institut de Recherches Cliniques de Montréal (IRCM), affiliated to the Division of Experimental Medicine, Faculty of Medicine and Health Sciences, McGill University, Montréal H2W 1R7, Canada.

<sup>5</sup>Cellular and Molecular Research Center, Iran University of Medical Sciences, Tehran, Iran

#### **\*Correspondence:**

Fatemeh Davami, PharmD/PhD, Full Professor at Pasteur Institute of Iran, Tehran, Iran. Email: [f.davami@gmail.com](mailto:f.davami@gmail.com) Tel: +982166402443 Fax: +982166465132

#### **\*Co-correspondence:**

Faezeh Faghihi, Ph.D., Associate Professor at Iran University of Medical Sciences, Email: [faezefaghihi@yahoo.com](mailto:faezefaghihi@yahoo.com) Tel: +982144604800 Fax: +982188622578

**Table S1** Sequence of primers and stem loops.

| No | Primer name               | Function                                                                  | 5' to 3' sequence              |
|----|---------------------------|---------------------------------------------------------------------------|--------------------------------|
| 1  | 5'junction F              | 5' junction amplification                                                 | GGACAGCACCCAGACTTACACC         |
| 2  | 5' junction R             | 5' junction amplification                                                 | CCTACCCGCTTCCATTGCTCAG         |
| 3  | 3' junction F             | 3' junction amplification                                                 | GCAACCTCCCCTTCTACGAGC          |
| 4  | 3' junction R             | 3' junction amplification                                                 | CATCGGGTAGATGAGCCCAC           |
| 5  | Genomic F                 | Out-out amplification                                                     | GTCCAGGCTCCCATTCTGACA<br>C     |
| 6  | Genomic R                 | Out-out amplification                                                     | CTTCTGCCTTCTGGTGGTGGAG         |
| 7  | Sponge-<br>Convergent F   | Linear and circular structure<br>of sponge amplification and<br>qRT-PCR   | AGTGCGGCCACCCTCAAGATC          |
| 8  | Sponge-<br>Convergent R   | Linear and circular structure<br>of sponge amplification and<br>qRT-PCR   | TTCAACACCGCGGCCACTTATG         |
| 9  | Sponge-<br>Divergent F    | Circular structure of sponge<br>amplification                             | CAGAACATAAGCTAGGCGTAT<br>GTGG  |
| 10 | Sponge-<br>Divergent R    | Circular structure of sponge<br>amplification                             | GTTCTGATGTTGATCTTGAGGG<br>TGGC |
| 11 | Scramble-<br>Convergent F | Linear and circular structure<br>of scramble amplification and<br>qRT-PCR | GTGCGGCCACCCTCAAGATAA          |
| 12 | Scramble-<br>Convergent R | Linear and circular structure<br>of scramble amplification and<br>qRT-PCR | TTCAACACCGCGGCCACTTATG         |

|    |                      |                                                   |                                                            |
|----|----------------------|---------------------------------------------------|------------------------------------------------------------|
| 13 | Scramble-Divergent F | Circular structure of scramble amplification      | ACCACTAAATAACATGGGCCCA<br>CAT                              |
| 14 | Scramble-Divergent R | Circular structure of scramble amplification      | TAGTGGTCGCATTATCTTGAGG<br>GTGG                             |
| 15 | <i>TK</i> 135 F      | Amplification of <i>TK</i> for qRT-PCR            | AGCAGAAAATGCCCCACGCTA                                      |
| 16 | <i>TK</i> 135 R      | Amplification of <i>TK</i> for qRT-PCR            | AGTAAGTCATCGGCTCGGGT                                       |
| 17 | <i>GFP</i> F         | Amplification of <i>EGFP</i> for qRT-PCR          | CAGAAGAACGGCATCAAGGT                                       |
| 18 | <i>GFP</i> R         | Amplification of <i>EGFP</i> for qRT-PCR          | GTGCTCAGGTAGTGGTTGTC                                       |
| 19 | <i>ACTB</i> F        | Amplification of <i>ACTB</i> for qRT-PCR          | GTCCTACCTGCCTTGACTACTT                                     |
| 20 | <i>ACTB</i> R        | Amplification of <i>ACTB</i> for qRT-PCR          | TACGACCAGAGGCATACAGGG                                      |
| 21 | miR-21 stem-loop     | Synthesis of miR-21 cDNA                          | GTCGTATGCAGAGCAGGGTCCG<br>AGGTATTCGCACTGGATACGAC<br>TCAACA |
| 22 | miR-21 F             | Amplification of miR-21 for qRT-PCR               | CCGGCCTAGCTTATCAGACTG                                      |
| 23 | U6 stem-loop         | Synthesis of U6 snoRNA cDNA                       | GTCGTATGCAGAGCAGGGTCCG<br>AGGTATTCGCACTGGATACGAC<br>CGCTTC |
| 24 | U6 F                 | Amplification of U6 snoRNA for qRT-PCR            | CTCGCTTCGGCAGCAC                                           |
| 25 | Universal R          | Amplification of miR-21 and U6 snoRNA for qRT-PCR | GTGCAGGGTCCGAGGT                                           |
| 26 | <i>Trim33</i> F      | Amplification of <i>Trim33</i> for qRT-PCR        | TCTACCCCCACAGCCTACAAG                                      |

|    |                 |                                            |                            |
|----|-----------------|--------------------------------------------|----------------------------|
| 27 | <i>Trim33</i> R | Amplification of <i>Trim33</i> for qRT-PCR | CGACTGCCAGTGCTAGATGTAC     |
| 28 | <i>Pdcd4</i> F  | Amplification of <i>Pdcd4</i> for qRT-PCR  | GGTGGACGTGAAAGATCCCAA<br>C |
| 29 | <i>Pdcd4</i> R  | Amplification of <i>Pdcd4</i> for qRT-PCR  | CCTCATTTGTGTCTCCGTGCTC     |
| 30 | <i>Atp11b</i> F | Amplification of <i>Atp11b</i> for qRT-PCR | CTCTTGCACTCAGGGAGCAT       |
| 31 | <i>Atp11b</i> R | Amplification of <i>Atp11b</i> for qRT-PCR | CCAACAGCCAATGTGATCGGT      |

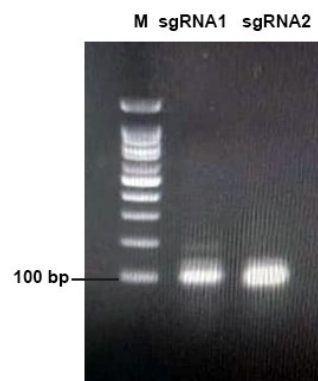

**Fig. S1 2% agarose gel electrophoresis of the in vitro transcription product.** sgRNA1 corresponds to the PITCh sgRNA, while sgRNA2 represents the genome-targeting sgRNA. The expected size for both sgRNAs is 100 bp. The M lane contains the 100 bp DNA marker.

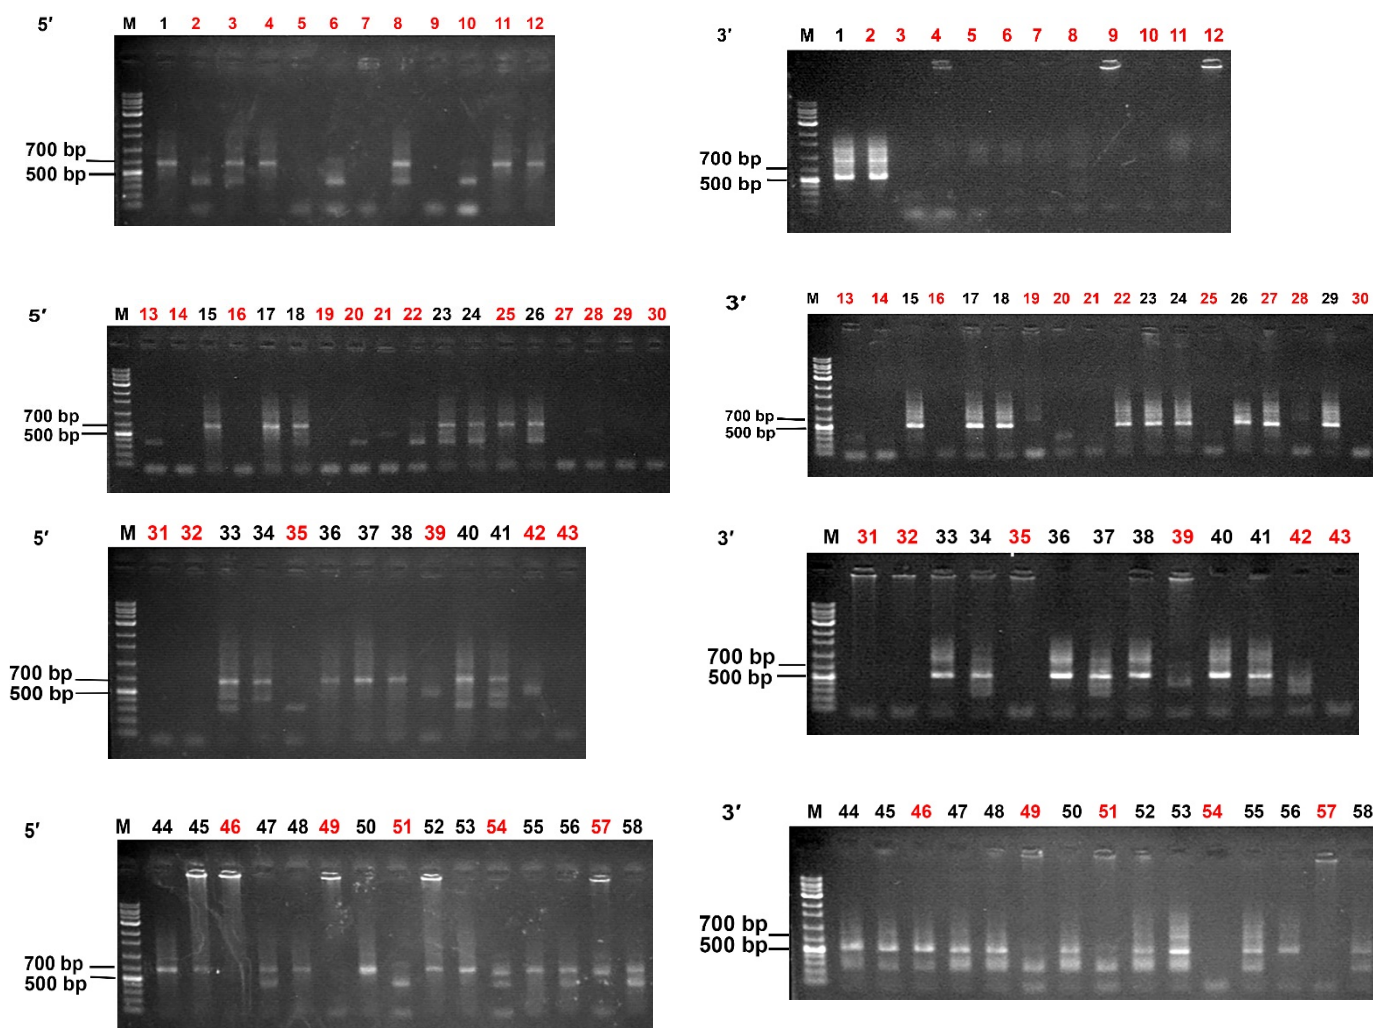

**Fig. S2 The results of agarose gel electrophoresis for the 5'/3' junction PCR of the landing pad on RNP based delivery system single clones.** The expected PCR product sizes were 666 bp for the 5' junction and 622 bp for the 3' junction PCRs. Positive clones in both the 5' and 3' junction PCRs are indicated by black numbers and negative clones for either 5' or 3' junction PCRs are indicated by red numbers. The M lane corresponds to the 1 kb DNA marker.

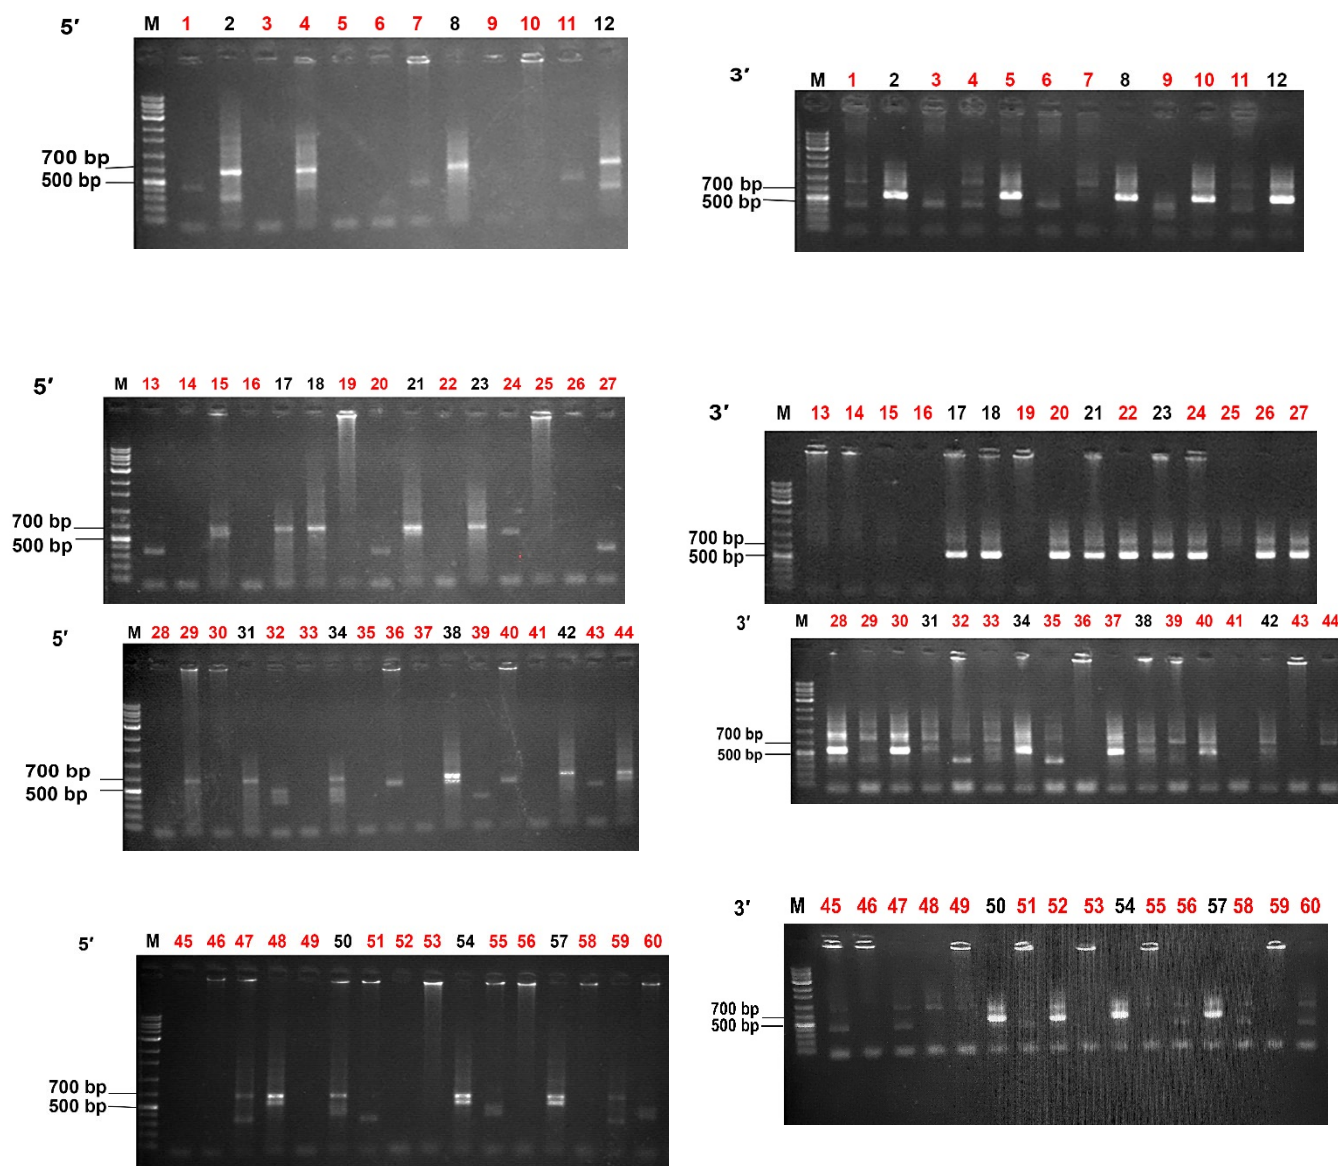

**Fig. S3 The results of agarose gel electrophoresis for the 5'/3' junction PCR of the landing pad on plasmid-based delivery system single clones.** The expected PCR product sizes were 666 bp for the 5' junction and 622 bp for the 3' junction PCRs. Positive clones in both the 5' and 3' junction PCRs are indicated by black numbers and negative clones for either the 5' or 3' junction PCRs are indicated by red numbers. The M lane corresponds to the 1 kb DNA marker.

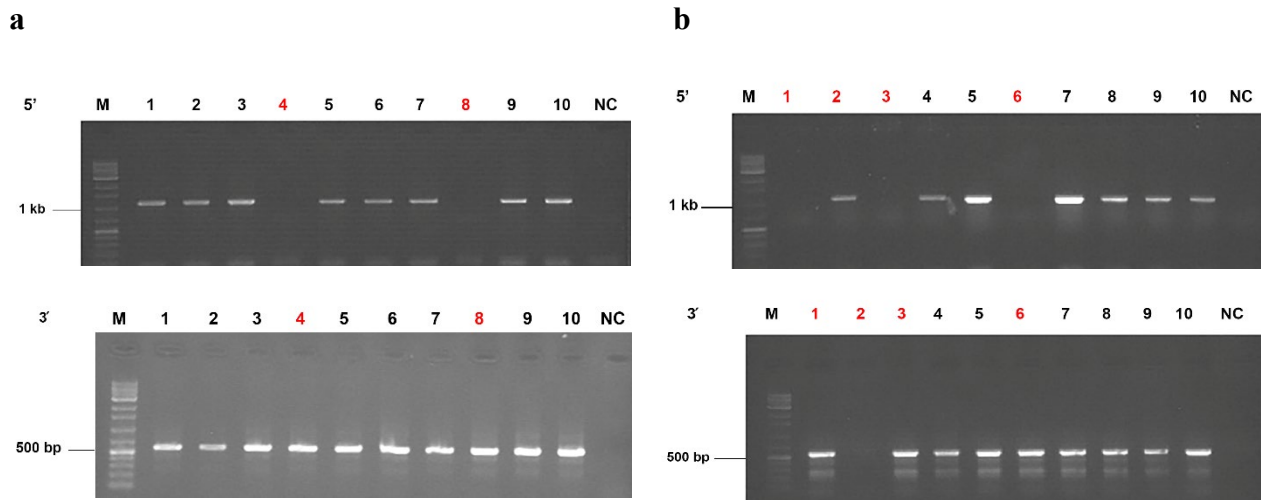

**Fig. S4 The results of agarose gel electrophoresis for the 5'/3' junction PCR on retargeted single clones.** **a** Agarose gel electrophoresis for the 5'/3' junction PCR on CM21D expressing single clones. **b** Agarose gel electrophoresis for the 5'/3' junction PCR on CM21SD expressing single clones. The expected PCR product sizes were approximately 1360 bp for the 5' junction and 646 bp for the 3' junction PCR. Positive clones in both the 5' and 3' junction PCRs are indicated by black numbers and negative clones for either the 5' or 3' junction PCRs are indicated by red numbers. The M lane corresponds to the 1 kb DNA marker, while the NC lane represents the negative control.



**a**

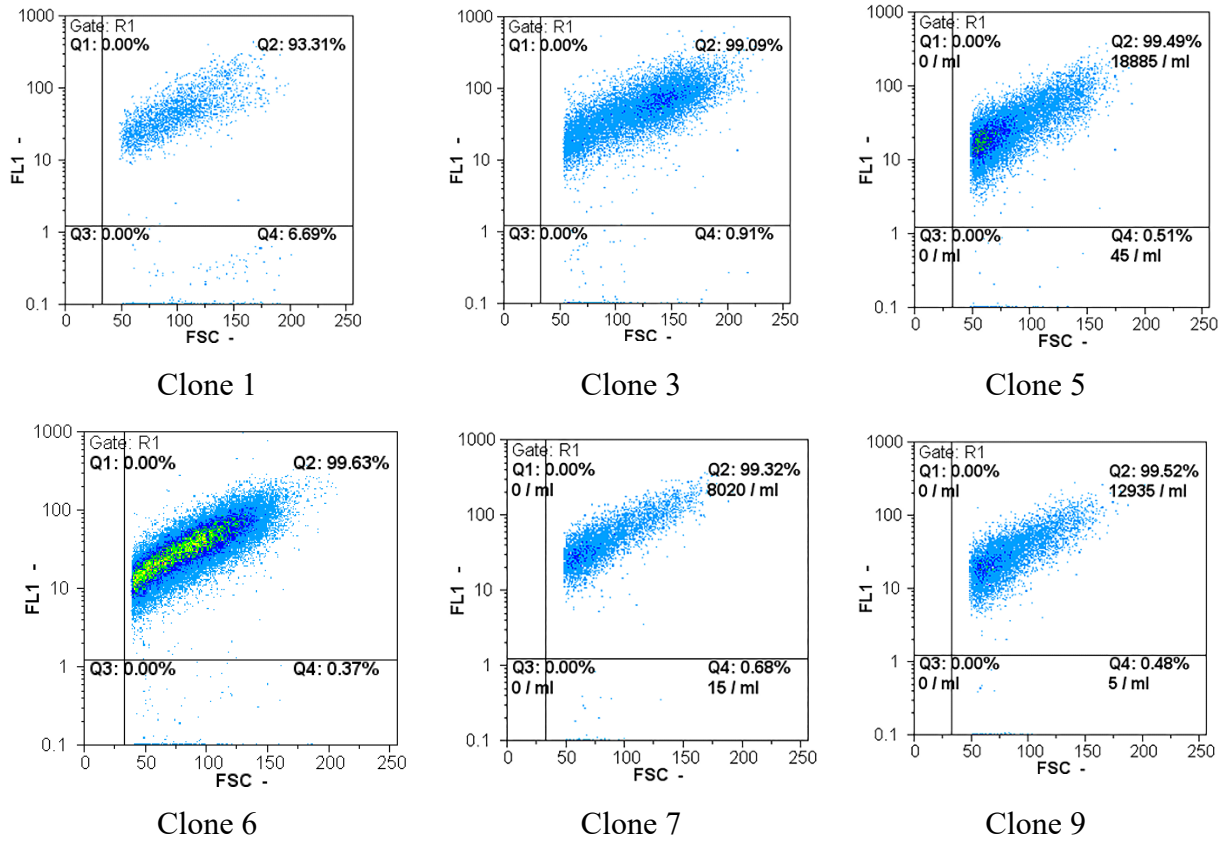

**b**

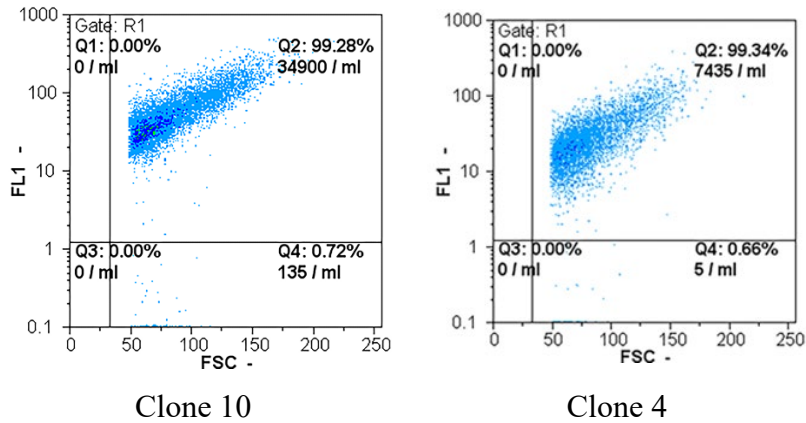

**Fig. S5 EGFP expression analysis in retargeted single clones by flow cytometry. a** Single clones retargeted with CM21D and expressed EGFP > 99% were selected for the next step. **b** A single clone retargeted with CM21SD, which also exhibited EGFP > 99%, was chosen next step.

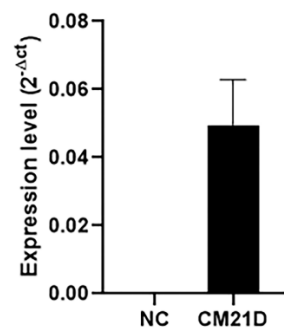

**Fig. S6 Validating the expression of CM21D.** Expression level of CM21D and CM21SD was measured using qRT-PCR (based on the formula  $2^{-\Delta Ct}$ ). The error bars correspond to the standard deviations observed in technical replicates ( $n = 3$ ).

**a**

| Tube | Concentration (ng/μl) | Absorbance |
|------|-----------------------|------------|
| 1    | 20                    | 1.004      |
| 2    | 10                    | 0.69       |
| 3    | 5                     | 0.4395     |
| 4    | 2.5                   | 0.303      |
| 5    | 1.25                  | 0.1975     |
| 6    | 0.625                 | 0.1385     |
| 7    | 0.3125                | 0.1115     |

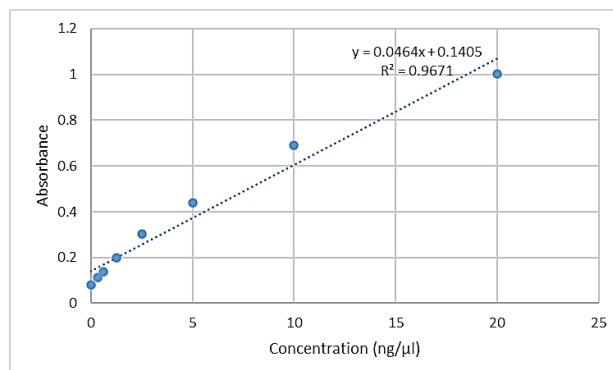

**b**

| Test group |                       | Control group |                       |
|------------|-----------------------|---------------|-----------------------|
| OD         | Concentration (μg/ml) | OD            | Concentration (μg/ml) |
| 0.721      | 6.143 μg/ml           | 0.452         | 3.263μg/ml            |
| 0.648      | 8.042 μg/ml           | 0.362         | 3.442μg/ml            |
| 0.5445     | 8.507 μg/ml           | 0.3493        | 4.326μg/ml            |

**Fig. S7 Determination of hrsACE2 productivity using ELISA assay. a** The standard curve is graphed with optical density (OD) plotted against the logarithm of protein concentration, as indicated in the table. **b** The concentration of hrsACE2 was determined in both the test and control groups. Three different dilutions were used: 1/500, 1/750, and 1/1000. Each dilution was tested in triplicate.
